# Supplementary material for: Electrostatically-driven elastomer components for user-reconfigurable high density microfluidics
Source: Royal Society of Chemistry journal article supplement (doi:10.1039/b813244e), 2009-01-01
Supplement: b813244e.pdf [file b813244e.pdf]

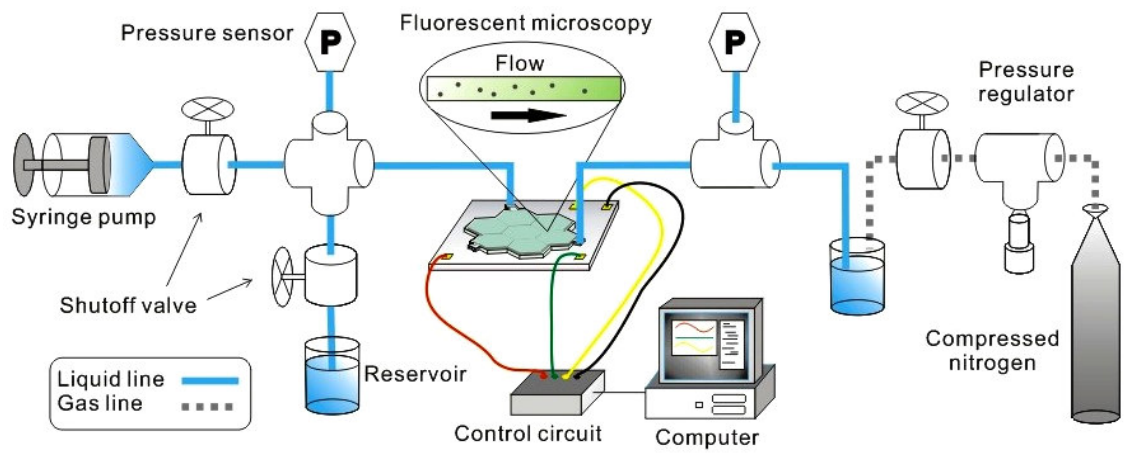

**Fig. S1** Experiment apparatus. A syringe pump is connected at the upstream to flush/fill the system prior to any test. Two pressure transducers are installed to measure the pressure difference across the chip. A nitrogen bottle is used as pressure source to generate backpressure for pressure characterization. The flow velocity is measured by detecting the displacement of 0.5  $\mu\text{m}$  microspheres.

---

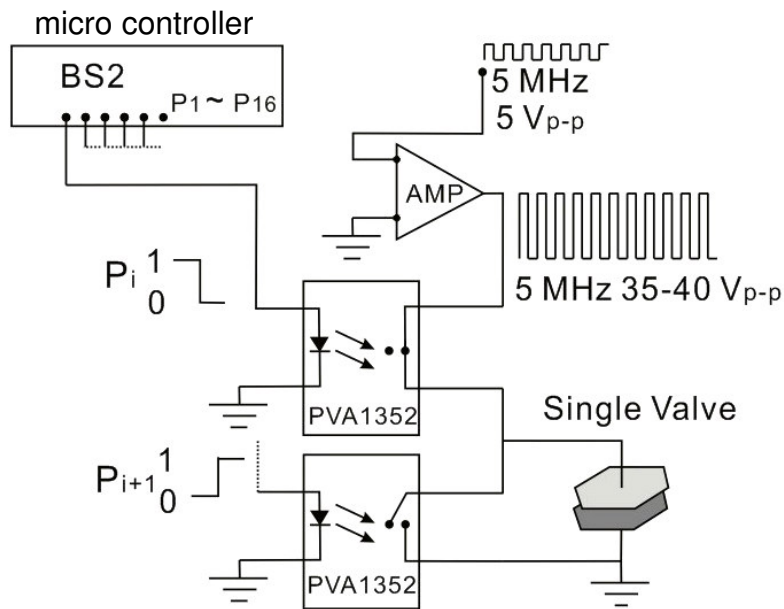

**Fig. S2** Control circuitry. Photovoltaic relay is controlled by a signal from the BS2 microcontroller. Signals from two adjacent ports  $P_i$  and  $P_{i+1}$  in BS2 are always out of phase, so the 5 MHz signal can be periodically switched between 15-20 V and ground.

---

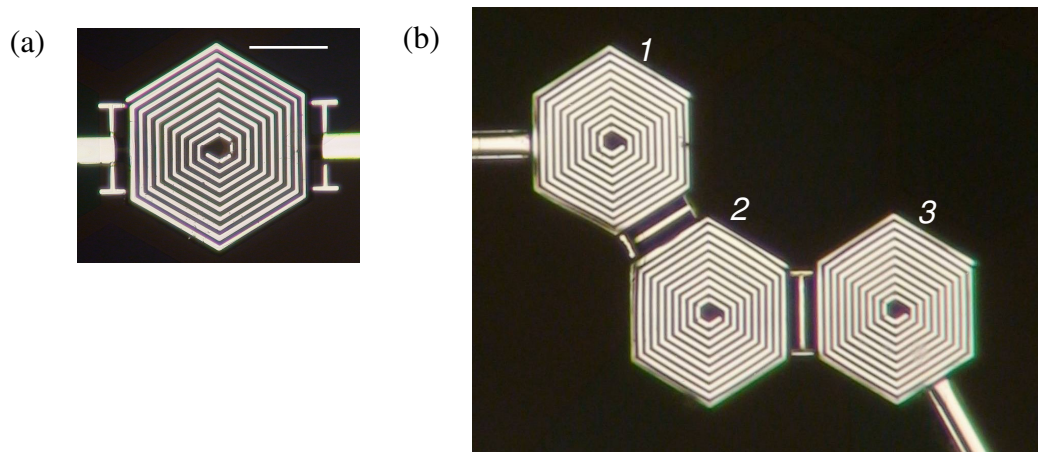

**Fig. S3** White-light micrograph of (a) a single hexagon valve and (b) a peristaltic micro pump. Scale bar is 200  $\mu\text{m}$ . Peristaltic pumping is achieved by actuating the valves in the following sequence:  $1 \rightarrow 1+2 \rightarrow 2 \rightarrow 2+3 \rightarrow 3 \rightarrow 1+3$ . The order is reversed when pumping from right to left.

---

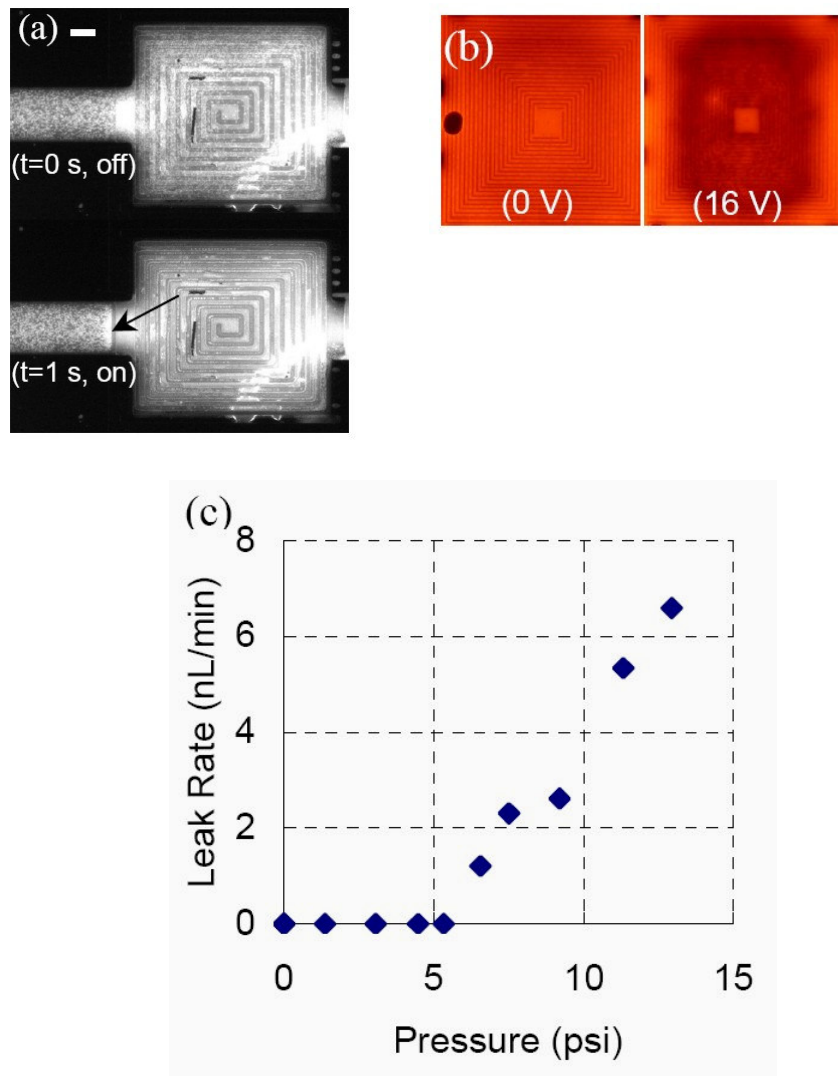

**Fig. S4** Valve characterization. (a) Inverted microscopy of open and closed valve. The valve was off at  $t = 0$  s. Microspheres flow freely. The valve was actuated at  $t = 1$  s. The PDMS-metal roof collapsed and the microspheres were trapped under the PDMS-metal membrane. When closed, the microspheres outside the valve chamber accumulated at the entrance of the valve chamber (arrows.) Scale bar,  $20 \mu\text{m}$ . (b) Fluorescent image of fluorophore-filled open and closed valve showing valve deflection. (c) Leak rate vs. pressure. The valve is effectively closed till the pressure is above 6 psi (41.37 kPa).

---
